# Supplementary material for: Cigarette Smoking and Endometrial Cancer Risk: Observational and Mendelian Randomization Analyses
Source: Oxford University Press journal article supplement (doi:10.1158/1055-9965.epi-21-1176), 2022-06-16
Supplement: epi-21-1176_supplementary_table_1_suppst1.docx [file epi-21-1176_supplementary_table_1_suppst1.docx]

| **Supplementary Table 1. Summary-level genetic association data of lifetime amount of smoking, body mass index, alcohol consumption, educational attainment, and endometrial cancer.** | | | | | | | | | | | | | | |
| --- | --- | --- | --- | --- | --- | --- | --- | --- | --- | --- | --- | --- | --- | --- |
|  |  |  | | Lifetime smoking | | Body mass index | | | Alcohol consumption | | Educational attainment | | Endometrial cancer | |
| Lifetime amount of smoking genome-wide significant variants | | | | | | | | | | | | | | |
| Variant | EA | OA | Beta | | SE | Beta | SE | Proxy variant | Beta | SE | Beta | SE | Beta | SE |
| rs1193237 | C | G | 0.011 | | 0.002 | 0.0006 | 0.0047 |  | 0.0035 | 0.0019 | -0.0086 | 0.0017 | 0.0362 | 0.0159 |
| rs4949465 | C | T | 0.017 | | 0.003 | 0.0095 | 0.0067 |  | 0.0021 | 0.0029 | -0.0129 | 0.0025 | -0.0277 | 0.0231 |
| rs549845 | G | A | 0.016 | | 0.002 | -0.0022 | 0.0050 | rs499257 | 0.0031 | 0.0021 | -0.0177 | 0.0019 | -0.0236 | 0.0168 |
| rs1933270 | T | G | 0.013 | | 0.002 | 0.0182 | 0.0054 |  | 0.0013 | 0.0020 | -0.0016 | 0.0018 | 0.0046 | 0.0156 |
| rs7528604 | G | A | 0.014 | | 0.002 | 0.0102 | 0.0047 |  | 0.0077 | 0.0020 | -0.0059 | 0.0017 | 0.0042 | 0.0157 |
| rs11210229 | A | G | 0.017 | | 0.002 | 0.0014 | 0.0047 |  | 0.0048 | 0.0020 | -0.0043 | 0.0017 | 0.0128 | 0.0155 |
| rs7553348 | G | A | 0.014 | | 0.002 | 0.0265 | 0.0040 |  | 0.0074 | 0.0020 | -0.0004 | 0.0017 | -0.0047 | 0.0152 |
| rs10922907 | A | T | 0.015 | | 0.002 |  |  |  | 0.0066 | 0.0020 | -0.0161 | 0.0017 | 0.0204 | 0.0158 |
| rs1931263 | T | G | 0.011 | | 0.002 | 0.0083 | 0.0049 |  | -0.0028 | 0.0019 | -0.0120 | 0.0017 | 0.0279 | 0.0152 |
| rs7519626 | C | T | 0.012 | | 0.002 | -0.0072 | 0.0050 | rs11166161 | -0.0014 | 0.0021 | -0.0069 | 0.0018 | 0.0093 | 0.0164 |
| rs9435340 | T | A | 0.012 | | 0.002 | 0.0082 | 0.0050 | rs1730850 | 0.0018 | 0.0021 | -0.0063 | 0.0018 | 0.0036 | 0.0161 |
| rs10918701 | G | A | 0.012 | | 0.002 | 0.0098 | 0.0049 | rs7548169 | 0.0031 | 0.0020 | -0.0010 | 0.0018 | 0.0210 | 0.0159 |
| rs2867112 | T | G | 0.021 | | 0.003 | 0.0676 | 0.0052 |  | 0.0075 | 0.0027 | -0.0048 | 0.0023 | 0.0252 | 0.0204 |
| rs6741228 | T | C | 0.011 | | 0.002 | 0.0007 | 0.0047 |  | 0.0000 | 0.0020 | -0.0075 | 0.0017 | 0.0144 | 0.0154 |
| rs62135536 | C | T | 0.035 | | 0.006 |  |  |  | 0.0271 | 0.0056 | -0.0092 | 0.0049 | -0.0058 | 0.0462 |
| rs7569203 | C | A | 0.016 | | 0.002 |  |  |  | 0.0148 | 0.0021 | -0.0026 | 0.0018 | -0.0153 | 0.0164 |
| rs13016665 | A | C | 0.012 | | 0.002 |  |  |  | 0.0081 | 0.0020 | -0.0012 | 0.0017 | -0.0049 | 0.0156 |
| rs4671357 | C | T | 0.014 | | 0.002 | -0.0034 | 0.0047 |  | -0.0005 | 0.0019 | -0.0091 | 0.0017 | 0.0188 | 0.0154 |
| rs359243 | C | T | 0.013 | | 0.002 | 0.0080 | 0.0047 | rs359250 | 0.0032 | 0.0020 | -0.0064 | 0.0017 | -0.0118 | 0.0156 |
| rs2678670 | A | T | 0.013 | | 0.002 |  |  |  | 0.0030 | 0.0020 | -0.0099 | 0.0017 | -0.0027 | 0.0153 |
| rs62155874 | G | A | 0.024 | | 0.003 | 0.0133 | 0.0073 | rs4851758 | 0.0015 | 0.0030 | -0.0142 | 0.0026 | -0.0052 | 0.0233 |
| rs3811038 | C | T | 0.014 | | 0.002 | 0.0024 | 0.0052 |  | 0.0081 | 0.0022 | -0.0066 | 0.0019 | 0.0162 | 0.0169 |
| rs2890772 | T | G | 0.020 | | 0.002 | 0.0037 | 0.0047 | rs16824949 | 0.0029 | 0.0020 | 0.0036 | 0.0017 | -0.0234 | 0.0156 |
| rs62175972 | T | C | 0.031 | | 0.006 |  |  |  | -0.0039 | 0.0054 | -0.0300 | 0.0048 | -0.0540 | 0.0410 |
| rs3769949 | A | T | 0.012 | | 0.002 | 0.0047 | 0.0047 |  | -0.0009 | 0.0019 | -0.0050 | 0.0017 | 0.0216 | 0.0154 |
| rs13009008 | A | G | 0.012 | | 0.002 | 0.0023 | 0.0050 | rs6750801 | 0.0008 | 0.0021 | -0.0095 | 0.0018 | -0.0071 | 0.0162 |
| rs4473348 | T | A | 0.015 | | 0.002 | 0.0139 | 0.0057 |  | 0.0045 | 0.0023 | 0.0026 | 0.0020 | 0.0133 | 0.0178 |
| rs12623702 | G | A | 0.014 | | 0.002 | 0.0080 | 0.0050 | rs1477031 | 0.0068 | 0.0020 | -0.0099 | 0.0017 | 0.0141 | 0.0158 |
| rs6779302 | T | G | 0.013 | | 0.002 | -0.0025 | 0.0049 | rs9870893 | 0.0044 | 0.0020 | -0.0113 | 0.0018 | 0.0002 | 0.0157 |
| rs6778080 | T | C | 0.016 | | 0.002 | -0.0014 | 0.0052 |  | 0.0067 | 0.0022 | -0.0139 | 0.0019 | -0.0124 | 0.0171 |
| rs775758 | A | T | 0.012 | | 0.002 | 0.0111 | 0.0047 |  | 0.0022 | 0.0020 | -0.0030 | 0.0017 | 0.0064 | 0.0158 |
| rs421983 | T | C | 0.013 | | 0.002 | 0.0064 | 0.0046 | rs1146751 | 0.0083 | 0.0019 | -0.0033 | 0.0017 | 0.0274 | 0.0154 |
| rs326341 | G | A | 0.014 | | 0.002 | 0.0087 | 0.0054 |  | 0.0010 | 0.0019 | -0.0063 | 0.0017 | 0.0097 | 0.0155 |
| rs73220544 | C | A | 0.016 | | 0.003 | 0.0011 | 0.0062 | rs4974473 | 0.0030 | 0.0027 | -0.0069 | 0.0024 | -0.0134 | 0.0212 |
| rs9842947 | T | C | 0.013 | | 0.002 | -0.0066 | 0.0043 | rs963354 | 0.0043 | 0.0021 | -0.0009 | 0.0018 | -0.0014 | 0.0165 |
| rs624833 | T | G | 0.013 | | 0.002 | 0.0089 | 0.0051 |  | 0.0059 | 0.0021 | -0.0132 | 0.0018 | -0.0079 | 0.0165 |
| rs61796681 | T | A | 0.019 | | 0.004 | 0.0075 | 0.0086 | rs7654612 | 0.0023 | 0.0034 | -0.0005 | 0.0030 | 0.0244 | 0.0274 |
| rs317021 | A | T | 0.017 | | 0.003 | -0.0051 | 0.0062 | rs317027 | 0.0062 | 0.0025 | -0.0057 | 0.0022 | -0.0281 | 0.0208 |
| rs72678864 | G | A | 0.018 | | 0.003 | -0.0018 | 0.0067 | rs11729080 | 0.0040 | 0.0027 | -0.0123 | 0.0023 | -0.0011 | 0.0212 |
| rs17576594 | G | A | 0.016 | | 0.002 | -0.0007 | 0.0052 |  | 0.0016 | 0.0022 | -0.0113 | 0.0019 | 0.0044 | 0.0169 |
| rs11948770 | C | T | 0.015 | | 0.002 | 0.0037 | 0.0055 |  | 0.0038 | 0.0023 | 0.0028 | 0.0020 | -0.0004 | 0.0180 |
| rs71627581 | G | A | 0.019 | | 0.003 |  |  |  | 0.0082 | 0.0032 | -0.0096 | 0.0028 | 0.0005 | 0.0259 |
| rs10052591 | T | C | 0.012 | | 0.002 | 0.0051 | 0.0046 | rs2068701 | 0.0059 | 0.0019 | 0.0018 | 0.0017 | 0.0021 | 0.0154 |
| rs2080870 | A | T | 0.012 | | 0.002 | 0.0007 | 0.0054 | rs159372 | 0.0055 | 0.0022 | -0.0158 | 0.0020 | -0.0049 | 0.0173 |
| rs4571506 | C | T | 0.011 | | 0.002 | 0.0063 | 0.0047 | rs4244212 | -0.0079 | 0.0019 | -0.0115 | 0.0017 | 0.0347 | 0.0153 |
| rs4957528 | C | A | 0.015 | | 0.002 | -0.0036 | 0.0061 |  | 0.0008 | 0.0024 | -0.0051 | 0.0021 | -0.0175 | 0.0193 |
| rs329120 | C | T | 0.014 | | 0.002 | 0.0111 | 0.0052 |  | 0.0000 | 0.0019 | -0.0083 | 0.0017 | 0.0015 | 0.0154 |
| rs986391 | G | A | 0.016 | | 0.002 | -0.0017 | 0.0050 |  | 0.0071 | 0.0020 | 0.0016 | 0.0018 | 0.0180 | 0.0164 |
| rs13153393 | G | A | 0.020 | | 0.003 | 0.0109 | 0.0072 | rs13180204 | 0.0016 | 0.0031 | -0.0055 | 0.0027 | 0.0219 | 0.0247 |
| rs245774 | G | A | 0.013 | | 0.002 | 0.0139 | 0.0052 | rs173465 | 0.0001 | 0.0022 | -0.0070 | 0.0019 | 0.0034 | 0.0171 |
| rs6935954 | A | G | 0.014 | | 0.002 | 0.0005 | 0.0040 |  | 0.0009 | 0.0020 | -0.0138 | 0.0017 | 0.0076 | 0.0155 |
| rs2254710 | C | A | 0.013 | | 0.002 | -0.0011 | 0.0054 | rs883372 | 0.0016 | 0.0023 | -0.0031 | 0.0020 | 0.0224 | 0.0178 |
| rs2894808 | A | T | 0.022 | | 0.004 | -0.0031 | 0.0084 |  | -0.0003 | 0.0036 | -0.0076 | 0.0031 | 0.0459 | 0.0285 |
| rs12202536 | G | A | 0.012 | | 0.002 | -0.0004 | 0.0046 | rs12529103 | 0.0059 | 0.0019 | -0.0019 | 0.0017 | 0.0008 | 0.0151 |
| rs7766610 | C | A | 0.018 | | 0.003 | -0.0087 | 0.0060 |  | 0.0056 | 0.0025 | 0.0008 | 0.0022 | -0.0253 | 0.0196 |
| rs1922018 | C | T | 0.014 | | 0.002 | -0.0017 | 0.0049 |  | 0.0040 | 0.0020 | -0.0057 | 0.0018 | -0.0114 | 0.0159 |
| rs10226228 | G | A | 0.016 | | 0.002 | 0.0151 | 0.0050 |  | -0.0007 | 0.0020 | -0.0116 | 0.0018 | -0.0040 | 0.0159 |
| rs11768481 | C | A | 0.013 | | 0.002 | 0.0004 | 0.0057 | rs11762736 | 0.0013 | 0.0021 | -0.0010 | 0.0018 | 0.0296 | 0.0176 |
| rs6962772 | A | G | 0.016 | | 0.003 | 0.0070 | 0.0064 |  | 0.0106 | 0.0027 | -0.0040 | 0.0023 | 0.0433 | 0.0213 |
| rs10282292 | C | T | 0.013 | | 0.002 | 0.0074 | 0.0049 |  | 0.0005 | 0.0020 | -0.0010 | 0.0018 | -0.0035 | 0.0160 |
| rs2401924 | G | C | 0.015 | | 0.002 | -0.0063 | 0.0046 | rs11531592 | 0.0025 | 0.0019 | 0.0044 | 0.0017 | -0.0228 | 0.0155 |
| rs7807019 | G | A | 0.015 | | 0.002 | 0.0020 | 0.0046 |  | 0.0013 | 0.0019 | -0.0106 | 0.0017 | -0.0215 | 0.0153 |
| rs6957896 | T | C | 0.011 | | 0.002 | -0.0011 | 0.0049 |  | 0.0008 | 0.0019 | -0.0016 | 0.0017 | -0.0181 | 0.0159 |
| rs4731925 | T | C | 0.012 | | 0.002 | 0.0032 | 0.0051 | rs1421306 | -0.0034 | 0.0021 | -0.0106 | 0.0018 | 0.0104 | 0.0167 |
| rs35169606 | T | G | 0.013 | | 0.002 |  |  |  | -0.0039 | 0.0020 | -0.0025 | 0.0018 | -0.0158 | 0.0181 |
| rs11783093 | C | T | 0.023 | | 0.003 | -0.0034 | 0.0064 |  | -0.0034 | 0.0027 | -0.0024 | 0.0023 | 0.0304 | 0.0214 |
| rs2062882 | A | G | 0.012 | | 0.002 | -0.0014 | 0.0047 |  | -0.0001 | 0.0020 | -0.0080 | 0.0017 | 0.0168 | 0.0156 |
| rs72674867 | A | T | 0.013 | | 0.002 | 0.0187 | 0.0053 | rs12679345 | -0.0004 | 0.0022 | -0.0067 | 0.0020 | -0.0219 | 0.0177 |
| rs4543592 | C | T | 0.012 | | 0.002 | -0.0066 | 0.0047 |  | 0.0009 | 0.0020 | -0.0067 | 0.0017 | -0.0271 | 0.0153 |
| rs7039819 | G | A | 0.013 | | 0.002 | -0.0027 | 0.0046 | rs7025335 | -0.0077 | 0.0020 | -0.0106 | 0.0017 | 0.0092 | 0.0159 |
| rs1246265 | C | T | 0.013 | | 0.002 | 0.0093 | 0.0052 | rs1246292 | 0.0056 | 0.0021 | -0.0048 | 0.0019 | -0.0039 | 0.0164 |
| rs1221148 | C | G | 0.013 | | 0.002 | -0.0104 | 0.0049 |  | 0.0008 | 0.0020 | 0.0001 | 0.0017 | -0.0199 | 0.0160 |
| rs13296519 | T | G | 0.014 | | 0.002 | -0.0006 | 0.0041 | rs10986849 | 0.0036 | 0.0020 | -0.0078 | 0.0017 | 0.0169 | 0.0160 |
| rs113382419 | A | C | 0.041 | | 0.003 | -0.0128 | 0.0109 | rs3025327 | -0.0045 | 0.0031 | 0.0053 | 0.0028 | -0.0246 | 0.0252 |
| rs11255908 | G | T | 0.015 | | 0.002 | -0.0032 | 0.0057 |  | 0.0001 | 0.0023 | -0.0050 | 0.0020 | -0.0023 | 0.0179 |
| rs2675638 | G | A | 0.012 | | 0.002 | 0.0044 | 0.0047 |  | 0.0017 | 0.0020 | -0.0068 | 0.0017 | 0.0197 | 0.0154 |
| rs10823968 | A | T | 0.012 | | 0.002 | -0.0034 | 0.0053 | rs7893781 | 0.0045 | 0.0020 | -0.0040 | 0.0018 | 0.0062 | 0.0159 |
| rs17553262 | C | A | 0.018 | | 0.003 | -0.0073 | 0.0082 |  | 0.0014 | 0.0031 | -0.0112 | 0.0027 | -0.0009 | 0.0241 |
| rs7077678 | C | T | 0.012 | | 0.002 | -0.0101 | 0.0040 |  | 0.0009 | 0.0020 | 0.0016 | 0.0017 | -0.0096 | 0.0155 |
| rs12244388 | A | G | 0.019 | | 0.002 | 0.0088 | 0.0040 | rs4532960 | 0.0048 | 0.0020 | -0.0065 | 0.0018 | -0.0046 | 0.0159 |
| rs3896224 | A | G | 0.014 | | 0.002 | 0.0045 | 0.0047 |  | 0.0021 | 0.0021 | -0.0088 | 0.0017 | 0.0245 | 0.0154 |
| rs34866095 | G | A | 0.012 | | 0.002 | 0.0061 | 0.0052 | rs1827535 | 0.0005 | 0.0021 | -0.0019 | 0.0018 | 0.0227 | 0.0164 |
| rs75742406 | G | A | 0.014 | | 0.002 | 0.0046 | 0.0044 | rs7949405 | 0.0011 | 0.0022 | -0.0010 | 0.0019 | 0.0319 | 0.0177 |
| rs17309874 | A | G | 0.016 | | 0.002 | 0.0309 | 0.0045 |  | 0.0025 | 0.0022 | -0.0083 | 0.0019 | 0.0569 | 0.0173 |
| rs4391802 | A | G | 0.015 | | 0.002 | 0.0109 | 0.0053 |  | 0.0046 | 0.0021 | -0.0072 | 0.0019 | 0.0301 | 0.0171 |
| rs112282219 | A | G | 0.033 | | 0.005 |  |  |  | 0.0170 | 0.0050 | -0.0017 | 0.0044 | 0.0847 | 0.0401 |
| rs9919670 | A | G | 0.022 | | 0.002 | -0.0230 | 0.0047 |  | 0.0066 | 0.0020 | -0.0074 | 0.0017 | -0.0009 | 0.0156 |
| rs74086911 | G | A | 0.021 | | 0.004 | -0.0006 | 0.0092 | rs12307828 | 0.0098 | 0.0037 | -0.0184 | 0.0034 | -0.0300 | 0.0291 |
| rs7297175 | C | T | 0.012 | | 0.002 |  |  |  | -0.0034 | 0.0020 | -0.0156 | 0.0017 | 0.0291 | 0.0156 |
| rs10879871 | G | T | 0.014 | | 0.002 | 0.0019 | 0.0050 |  | 0.0096 | 0.0020 | -0.0084 | 0.0018 | 0.0161 | 0.0162 |
| rs12831617 | T | C | 0.013 | | 0.002 | -0.0032 | 0.0058 | rs1380404 | 0.0025 | 0.0023 | -0.0048 | 0.0020 | 0.0190 | 0.0182 |
| rs6562474 | C | G | 0.012 | | 0.002 | -0.0011 | 0.0053 | rs9529137 | 0.0047 | 0.0020 | -0.0043 | 0.0018 | 0.0081 | 0.0160 |
| rs7333559 | G | A | 0.015 | | 0.002 |  |  |  | -0.0030 | 0.0024 | -0.0060 | 0.0021 | 0.0202 | 0.0199 |
| rs860326 | C | T | 0.012 | | 0.002 | -0.0016 | 0.0047 | rs864279 | 0.0039 | 0.0019 | -0.0088 | 0.0017 | 0.0240 | 0.0158 |
| rs7155595 | C | A | 0.013 | | 0.002 | -0.0035 | 0.0052 | rs12434503 | 0.0040 | 0.0020 | -0.0073 | 0.0018 | -0.0017 | 0.0164 |
| rs3742365 | C | T | 0.016 | | 0.002 | 0.0123 | 0.0047 |  | 0.0059 | 0.0020 | 0.0059 | 0.0017 | -0.0150 | 0.0156 |
| rs35175834 | A | G | 0.024 | | 0.002 | -0.0117 | 0.0057 | rs8033799 | 0.0089 | 0.0023 | -0.0129 | 0.0021 | -0.0150 | 0.0185 |
| rs28485305 | C | T | 0.012 | | 0.002 | 0.0050 | 0.0047 | rs4887161 | 0.0032 | 0.0020 | -0.0008 | 0.0018 | -0.0080 | 0.0157 |
| rs8042849 | C | T | 0.028 | | 0.002 | -0.0069 | 0.0042 | rs2036527 | -0.0017 | 0.0021 | 0.0002 | 0.0018 | -0.0049 | 0.0160 |
| rs8042134 | G | T | 0.014 | | 0.002 |  |  |  | 0.0022 | 0.0020 | -0.0079 | 0.0017 | 0.0003 | 0.0162 |
| rs6598539 | C | T | 0.012 | | 0.002 | -0.0002 | 0.0039 | rs8027457 | 0.0050 | 0.0019 | -0.0065 | 0.0017 | -0.0055 | 0.0155 |
| rs11861214 | G | T | 0.014 | | 0.002 | 0.0112 | 0.0057 | rs7205124 | -0.0071 | 0.0024 | -0.0114 | 0.0020 | 0.0082 | 0.0182 |
| rs12708665 | G | A | 0.013 | | 0.002 | 0.0108 | 0.0051 | rs13336226 | 0.0046 | 0.0021 | -0.0089 | 0.0019 | -0.0006 | 0.0168 |
| rs57611503 | G | A | 0.011 | | 0.002 |  |  |  | -0.0051 | 0.0020 | -0.0033 | 0.0017 | 0.0017 | 0.0158 |
| rs889398 | C | T | 0.013 | | 0.002 | 0.0166 | 0.0039 |  | 0.0021 | 0.0020 | -0.0018 | 0.0017 | 0.0273 | 0.0154 |
| rs60952428 | T | C | 0.019 | | 0.003 |  |  |  | 0.0033 | 0.0035 | -0.0079 | 0.0031 | -0.0141 | 0.0273 |
| rs1050847 | C | T | 0.011 | | 0.002 | -0.0055 | 0.0047 |  | 0.0034 | 0.0020 | -0.0108 | 0.0017 | 0.0118 | 0.0157 |
| rs369230 | T | G | 0.013 | | 0.002 |  |  |  | 0.0048 | 0.0022 | -0.0052 | 0.0019 | 0.0118 | 0.0171 |
| rs8614 | A | C | 0.017 | | 0.003 | -0.0001 | 0.0053 |  | -0.0051 | 0.0026 | -0.0041 | 0.0022 | -0.0447 | 0.0207 |
| rs732083 | G | A | 0.012 | | 0.002 | -0.0135 | 0.0070 | rs12940986 | -0.0053 | 0.0021 | -0.0081 | 0.0018 | 0.0039 | 0.0161 |
| rs9904288 | T | C | 0.012 | | 0.002 | 0.0036 | 0.0052 |  | -0.0066 | 0.0021 | -0.0106 | 0.0019 | 0.0285 | 0.0169 |
| rs67596067 | A | G | 0.013 | | 0.002 | -0.0030 | 0.0050 | rs12600543 | 0.0005 | 0.0021 | -0.0036 | 0.0018 | -0.0028 | 0.0162 |
| rs12967855 | A | G | 0.012 | | 0.002 | 0.0047 | 0.0051 |  | 0.0033 | 0.0020 | -0.0194 | 0.0018 | 0.0089 | 0.0166 |
| rs62098013 | A | G | 0.012 | | 0.002 | 0.0069 | 0.0047 | rs1504746 | -0.0047 | 0.0021 | -0.0126 | 0.0018 | 0.0172 | 0.0159 |
| rs71367545 | A | G | 0.015 | | 0.002 | 0.0096 | 0.0064 | rs7241572 | -0.0028 | 0.0024 | -0.0125 | 0.0021 | 0.0047 | 0.0199 |
| rs76608582 | C | A | 0.031 | | 0.005 |  |  |  | 0.0030 | 0.0051 | -0.0280 | 0.0045 | 0.1082 | 0.0447 |
| rs35343344 | C | A | 0.013 | | 0.002 | 0.0159 | 0.0045 | rs17724992 | 0.0004 | 0.0024 | -0.0059 | 0.0020 | 0.0270 | 0.0181 |
| rs4814873 | C | T | 0.014 | | 0.002 | 0.0081 | 0.0057 | rs4814877 | 0.0012 | 0.0023 | -0.0064 | 0.0020 | 0.0217 | 0.0181 |
| rs6119897 | A | G | 0.018 | | 0.002 | 0.0000 | 0.0053 |  | 0.0055 | 0.0022 | -0.0069 | 0.0020 | -0.0054 | 0.0179 |
| rs12481282 | C | G | 0.013 | | 0.002 | -0.0070 | 0.0068 |  | 0.0065 | 0.0022 | -0.0027 | 0.0019 | -0.0136 | 0.0173 |
| rs348809 | G | A | 0.012 | | 0.002 | -0.0006 | 0.0050 | rs348805 | 0.0010 | 0.0020 | -0.0050 | 0.0018 | 0.0035 | 0.0165 |
| rs6011779 | C | T | 0.028 | | 0.003 |  |  |  | 0.0038 | 0.0027 | -0.0042 | 0.0022 | 0.0087 | 0.0197 |
| rs147412694 | A | G | 0.017 | | 0.003 | -0.0007 | 0.0072 | rs2249651 | 0.0088 | 0.0028 | 0.0008 | 0.0024 | 0.0083 | 0.0219 |
| rs2838834 | T | C | 0.013 | | 0.002 | 0.0087 | 0.0051 |  | 0.0007 | 0.0021 | 0.0009 | 0.0019 | 0.0071 | 0.0167 |
| rs136233 | G | A | 0.014 | | 0.003 | 0.0119 | 0.0060 |  | 0.0009 | 0.0024 | -0.0058 | 0.0022 | 0.0085 | 0.0198 |
| rs202645 | G | A | 0.015 | | 0.002 | -0.0124 | 0.0057 | rs202659 | 0.0108 | 0.0024 | 0.0001 | 0.0021 | -0.0301 | 0.0189 |
| Body mass index genome-wide significant variants | | | | | | | | | | | | | | |
| rs17391694 | T | C | 0.009 | | 0.003 | 0.0338 | 0.0068 |  | -0.0043 | 0.0028 | -0.0107 | 0.0025 | 0.0495 | 0.0235 |
| rs543874 | G | A | 0.010 | | 0.002 | 0.0603 | 0.0050 |  | -0.0065 | 0.0024 | -0.0047 | 0.0021 | 0.0035 | 0.0190 |
| rs4639527 | G | A | 0.007 | | 0.002 | 0.0134 | 0.0053 |  | 0.0044 | 0.0021 | 0.0012 | 0.0018 | -0.0051 | 0.0174 |
| rs3922853 | A | C | 0.001 | | 0.003 | 0.0000 | 0.0072 |  | -0.0033 | 0.0026 | -0.0079 | 0.0023 | 0.0075 | 0.0207 |
| rs11128760 | G | A | 0.002 | | 0.002 | -0.0109 | 0.0047 |  | 0.0033 | 0.0020 | 0.0035 | 0.0017 | 0.0037 | 0.0154 |
| rs6786582 | C | T | 0.002 | | 0.002 | 0.0206 | 0.0045 |  | 0.0003 | 0.0022 | -0.0034 | 0.0019 | 0.0094 | 0.0171 |
| rs39654 | G | A | 0.007 | | 0.002 | 0.0202 | 0.0049 |  | -0.0008 | 0.0020 | -0.0018 | 0.0017 | -0.0037 | 0.0161 |
| rs262956 | T | G | 0.000 | | 0.002 | 0.0156 | 0.0049 |  | -0.0026 | 0.0020 | -0.0037 | 0.0018 | 0.0035 | 0.0161 |
| rs9816226 | T | A | 0.001 | | 0.003 | 0.0406 | 0.0052 |  | -0.0043 | 0.0025 | 0.0078 | 0.0022 | 0.0165 | 0.0201 |
| rs13107325 | C | T | 0.005 | | 0.004 | -0.0446 | 0.0087 |  | 0.0369 | 0.0040 | 0.0188 | 0.0034 | 0.0077 | 0.0302 |
| rs2307111 | T | C | 0.004 | | 0.002 | 0.0264 | 0.0040 |  | -0.0019 | 0.0020 | -0.0052 | 0.0017 | 0.0053 | 0.0156 |
| rs9349239 | G | A | 0.003 | | 0.002 | -0.0092 | 0.0047 |  | -0.0002 | 0.0019 | 0.0003 | 0.0017 | 0.0057 | 0.0154 |
| rs2875762 | G | C | 0.001 | | 0.002 | -0.0102 | 0.0058 |  | -0.0009 | 0.0023 | 0.0012 | 0.0020 | 0.0089 | 0.0185 |
| rs4718966 | C | T | 0.000 | | 0.002 | -0.0181 | 0.0047 |  | -0.0046 | 0.0020 | -0.0054 | 0.0017 | 0.0002 | 0.0154 |
| rs13247665 | C | T | 0.001 | | 0.002 | 0.0238 | 0.0049 |  | 0.0038 | 0.0020 | 0.0033 | 0.0018 | 0.0056 | 0.0159 |
| rs11496125 | T | C | 0.001 | | 0.002 | 0.0128 | 0.0047 |  | 0.0023 | 0.0020 | 0.0025 | 0.0017 | 0.0015 | 0.0155 |
| rs16932761 | G | A | 0.001 | | 0.002 | 0.0063 | 0.0053 |  | 0.0004 | 0.0022 | -0.0041 | 0.0020 | 0.0189 | 0.0178 |
| rs1405348 | A | G | 0.006 | | 0.002 | -0.0181 | 0.0046 |  | 0.0026 | 0.0019 | -0.0029 | 0.0017 | -0.0394 | 0.0153 |
| rs17820822 | T | G | 0.005 | | 0.002 | 0.0126 | 0.0050 |  | 0.0037 | 0.0020 | -0.0049 | 0.0018 | 0.0087 | 0.0160 |
| rs13290794 | A | G | 0.005 | | 0.002 | -0.0151 | 0.0049 |  | 0.0006 | 0.0020 | -0.0015 | 0.0018 | 0.0142 | 0.0159 |
| rs7865157 | T | C | 0.004 | | 0.003 | 0.0160 | 0.0076 |  | -0.0007 | 0.0032 | -0.0056 | 0.0028 | 0.0101 | 0.0261 |
| rs3829849 | T | C | 0.001 | | 0.002 | 0.0175 | 0.0041 |  | -0.0045 | 0.0020 | -0.0011 | 0.0018 | 0.0132 | 0.0159 |
| rs7899106 | A | G | 0.002 | | 0.005 | -0.0439 | 0.0091 |  | 0.0000 | 0.0044 | -0.0056 | 0.0039 | -0.0546 | 0.0353 |
| rs10878946 | C | T | 0.011 | | 0.002 | 0.0138 | 0.0052 |  | 0.0030 | 0.0022 | 0.0015 | 0.0019 | -0.0116 | 0.0176 |
| rs11611496 | G | A | 0.005 | | 0.002 | 0.0166 | 0.0057 |  | 0.0051 | 0.0023 | -0.0059 | 0.0020 | 0.0078 | 0.0190 |
| rs12429545 | G | A | 0.002 | | 0.003 | -0.0322 | 0.0060 |  | 0.0020 | 0.0030 | 0.0000 | 0.0025 | -0.0348 | 0.0230 |
| rs9538141 | G | A | 0.003 | | 0.002 | -0.0100 | 0.0047 |  | -0.0020 | 0.0020 | -0.0045 | 0.0017 | -0.0169 | 0.0156 |
| rs9530843 | A | C | 0.003 | | 0.002 | 0.0107 | 0.0050 |  | -0.0003 | 0.0019 | -0.0027 | 0.0017 | 0.0039 | 0.0159 |
| rs12885454 | C | A | 0.000 | | 0.002 | 0.0228 | 0.0041 |  | 0.0016 | 0.0020 | -0.0021 | 0.0018 | 0.0111 | 0.0159 |
| rs17522122 | T | G | 0.010 | | 0.002 | 0.0188 | 0.0041 |  | 0.0008 | 0.0019 | -0.0055 | 0.0017 | 0.0283 | 0.0155 |
| rs12587412 | T | G | 0.005 | | 0.002 | 0.0062 | 0.0049 |  | 0.0015 | 0.0020 | -0.0041 | 0.0017 | -0.0367 | 0.0152 |
| rs17105272 | C | T | 0.006 | | 0.002 | -0.0159 | 0.0051 |  | 0.0022 | 0.0021 | -0.0054 | 0.0018 | 0.0246 | 0.0166 |
| rs3850422 | G | A | 0.008 | | 0.002 | 0.0110 | 0.0040 |  | 0.0021 | 0.0020 | -0.0027 | 0.0017 | -0.0361 | 0.0154 |
| rs316611 | C | T | 0.000 | | 0.002 | -0.0110 | 0.0057 |  | 0.0038 | 0.0022 | -0.0010 | 0.0020 | -0.0289 | 0.0176 |
| rs403656 | A | G | 0.005 | | 0.003 | 0.0141 | 0.0066 |  | -0.0038 | 0.0027 | -0.0046 | 0.0024 | 0.0013 | 0.0213 |
| rs7181498 | T | C | 0.008 | | 0.002 | 0.0204 | 0.0049 |  | 0.0054 | 0.0020 | -0.0052 | 0.0018 | 0.0452 | 0.0157 |
| rs17681708 | T | C | 0.004 | | 0.002 | -0.0113 | 0.0050 |  | -0.0034 | 0.0021 | 0.0012 | 0.0018 | 0.0404 | 0.0169 |
| rs10438964 | C | T | 0.007 | | 0.002 | 0.0058 | 0.0053 |  | 0.0042 | 0.0022 | -0.0045 | 0.0019 | -0.0266 | 0.0171 |
| rs2229616 | C | T | 0.017 | | 0.007 | 0.1030 | 0.0150 |  | 0.0029 | 0.0065 | -0.0094 | 0.0061 | 0.0504 | 0.0544 |
| rs273504 | A | G | 0.000 | | 0.002 | -0.0103 | 0.0050 |  | -0.0004 | 0.0020 | 0.0043 | 0.0017 | -0.0199 | 0.0154 |
| rs8102137 | C | T | 0.008 | | 0.002 | 0.0140 | 0.0051 |  | -0.0006 | 0.0021 | 0.0009 | 0.0018 | 0.0008 | 0.0162 |
| rs11672660 | C | T | 0.000 | | 0.003 | 0.0321 | 0.0050 |  | 0.0029 | 0.0025 | -0.0031 | 0.0021 | 0.0336 | 0.0195 |
| rs1884897 | G | A | 0.002 | | 0.002 | 0.0141 | 0.0041 |  | 0.0045 | 0.0020 | 0.0010 | 0.0018 | 0.0290 | 0.0159 |
| rs6142096 | G | A | 0.003 | | 0.002 | -0.0173 | 0.0046 |  | -0.0017 | 0.0019 | 0.0023 | 0.0017 | -0.0015 | 0.0152 |
| Alcohol consumption genome-wide significant variants | | | | | | | | | | | | | | |
| rs2011092 | T | C | 0.003 | | 0.002 | -0.0055 | 0.0050 |  | 0.0089 | 0.0015 | -0.0076 | 0.0018 | -0.0340 | 0.0159 |
| rs4501255 | G | C | 0.010 | | 0.002 | 0.0091 | 0.0057 |  | 0.0107 | 0.0017 | -0.0073 | 0.0020 | 0.0032 | 0.0184 |
| rs2165670 | G | A | 0.003 | | 0.003 | -0.0153 | 0.0075 | rs2298753 | -0.0231 | 0.0024 | 0.0073 | 0.0027 | -0.0184 | 0.0249 |
| rs13107325 | C | T | 0.005 | | 0.004 | -0.0446 | 0.0087 |  | 0.0275 | 0.0028 | 0.0188 | 0.0034 | 0.0077 | 0.0302 |
| rs1217091 | C | T | 0.003 | | 0.003 | -0.0060 | 0.0060 |  | 0.0122 | 0.0019 | 0.0062 | 0.0022 | -0.0165 | 0.0201 |
| rs17665139 | C | T | 0.003 | | 0.003 | 0.0087 | 0.0065 | rs12770757 | 0.0116 | 0.0020 | 0.0041 | 0.0024 | -0.0242 | 0.0212 |
| rs10876188 | C | T | 0.009 | | 0.002 | 0.0070 | 0.0047 |  | 0.0080 | 0.0015 | -0.0025 | 0.0017 | -0.0023 | 0.0152 |
| rs500321 | A | T | 0.004 | | 0.002 | -0.0025 | 0.0053 | rs574593 | 0.0097 | 0.0017 | -0.0038 | 0.0019 | -0.0129 | 0.0175 |
| rs2180870 | C | T | 0.008 | | 0.003 | -0.0068 | 0.0071 |  | -0.0122 | 0.0021 | -0.0091 | 0.0026 | 0.0064 | 0.0225 |
| rs62044525 | C | G | 0.003 | | 0.003 | 0.0001 | 0.0064 | rs17487769 | 0.0122 | 0.0019 | -0.0007 | 0.0022 | 0.0178 | 0.0197 |
| 17:44246624_C_A | C | A | 0.009 | | 0.002 |  |  |  | 0.0218 | 0.0026 |  |  | 0.0036 | 0.0187 |
| rs4092465 | A | G | 0.003 | | 0.002 | -0.0003 | 0.0053 |  | 0.0083 | 0.0015 | -0.0013 | 0.0018 | -0.0115 | 0.0164 |
| Educational attainment genome-wide significant variants | | | | | | | | | | | | | | |
| rs34305371 | G | A | 0.0064 | | 0.003 | -0.0231 | 0.0072 |  | 0.0166 | 0.0033 | -0.0314 | 0.0024 | 0.0066 | 0.0274 |
| rs575113 | G | A | 0.002 | | 0.002 | -0.0068 | 0.0051 | rs3738773 | 0.0034 | 0.0021 | -0.0133 | 0.0015 | -0.0292 | 0.0168 |
| rs11678980 | A | G | 0.009 | | 0.002 |  |  |  | 0.0052 | 0.0021 | -0.0166 | 0.0014 | -0.0058 | 0.0161 |
| rs6757087 | T | G | 0.006 | | 0.002 | 0.0059 | 0.0049 |  | -0.0022 | 0.0020 | -0.0085 | 0.0014 | 0.0228 | 0.0161 |
| rs115693355 | G | A | 0.008 | | 0.007 |  |  |  | 0.0133 | 0.0072 | -0.0309 | 0.0053 | -0.1416 | 0.0589 |
| rs7650602 | T | C | 0.002 | | 0.002 | -0.0055 | 0.0047 | rs6763927 | 0.0014 | 0.0020 | -0.0089 | 0.0014 | -0.0343 | 0.0154 |
| rs77025239 | A | G | 0.003 | | 0.003 | 0.0153 | 0.0064 | rs741501 | -0.0022 | 0.0028 | -0.0140 | 0.0019 | 0.0136 | 0.0214 |
| rs13107325 | C | T | 0.005 | | 0.004 | -0.0446 | 0.0087 |  | 0.0369 | 0.0040 | 0.0239 | 0.0027 | 0.0077 | 0.0302 |
| rs17563464 | A | C | 0.003 | | 0.002 | 0.0072 | 0.0071 |  | -0.0001 | 0.0025 | -0.0147 | 0.0017 | 0.0157 | 0.0199 |
| rs72829857 | A | G | 0.006 | | 0.002 | 0.0126 | 0.0054 | rs6939294 | -0.0050 | 0.0023 | -0.0149 | 0.0016 | -0.0225 | 0.0180 |
| rs4895650 | C | T | 0.007 | | 0.002 |  |  |  | 0.0007 | 0.0020 | -0.0093 | 0.0014 | -0.0152 | 0.0157 |
| rs113588399 | C | T | 0.002 | | 0.002 | 0.0031 | 0.0058 | rs6928549 | -0.0016 | 0.0024 | 0.0104 | 0.0017 | 0.0018 | 0.0190 |
| rs929511 | T | C | 0.005 | | 0.003 |  |  |  | -0.0008 | 0.0030 | -0.0160 | 0.0021 | 0.0455 | 0.0238 |
| rs7796103 | C | G | 0.003 | | 0.002 |  |  |  | 0.0021 | 0.0019 | -0.0077 | 0.0014 | 0.0175 | 0.0155 |
| rs35417702 | C | T | 0.006 | | 0.002 | -0.0126 | 0.0046 | rs756912 | 0.0016 | 0.0019 | 0.0152 | 0.0014 | -0.0343 | 0.0152 |
| rs113615161 | T | C | 0.009 | | 0.003 | 0.0257 | 0.0075 | rs12673776 | -0.0031 | 0.0028 | -0.0123 | 0.0021 | 0.0081 | 0.0231 |
| rs57352738 | A | T | 0.011 | | 0.002 | -0.0053 | 0.0058 | rs17167170 | 0.0040 | 0.0024 | -0.0152 | 0.0017 | -0.0003 | 0.0188 |
| rs401526 | T | C | 0.002 | | 0.002 | -0.0001 | 0.0047 | rs837080 | 0.0001 | 0.0019 | -0.0104 | 0.0014 | -0.0042 | 0.0152 |
| rs746839 | G | C | 0.002 | | 0.002 | 0.0072 | 0.0049 | rs903959 | -0.0086 | 0.0021 | -0.0135 | 0.0015 | -0.0007 | 0.0158 |
| rs7849487 | T | G | 0.004 | | 0.002 | 0.0035 | 0.0054 |  | 0.0001 | 0.0020 | -0.0167 | 0.0015 | 0.0075 | 0.0160 |
| rs10984445 | A | G | 0.000 | | 0.002 | -0.0055 | 0.0046 | rs10818288 | -0.0005 | 0.0019 | 0.0115 | 0.0014 | -0.0214 | 0.0156 |
| rs12005151 | G | A | 0.002 | | 0.002 | 0.0004 | 0.0050 | rs7862560 | -0.0042 | 0.0021 | -0.0087 | 0.0015 | 0.0040 | 0.0168 |
| rs488476 | C | G | 0.008 | | 0.002 | -0.0008 | 0.0050 | rs580255 | 0.0003 | 0.0020 | -0.0113 | 0.0015 | 0.0127 | 0.0156 |
| rs7974852 | C | A | 0.004 | | 0.002 | 0.0072 | 0.0047 |  | 0.0003 | 0.0020 | -0.0117 | 0.0014 | 0.0139 | 0.0152 |
| rs7965154 | A | C | 0.004 | | 0.002 | 0.0078 | 0.0051 |  | -0.0029 | 0.0020 | -0.0085 | 0.0015 | 0.0391 | 0.0164 |
| rs3751331 | A | G | 0.007 | | 0.002 | 0.0056 | 0.0047 | rs1962047 | 0.0037 | 0.0020 | -0.0097 | 0.0014 | -0.0111 | 0.0157 |
| rs7977614 | A | G | 0.008 | | 0.002 | 0.0135 | 0.0069 |  | 0.0036 | 0.0022 | -0.0134 | 0.0016 | 0.0121 | 0.0190 |
| rs1334297 | G | A | 0.010 | | 0.002 | 0.0119 | 0.0053 |  | -0.0029 | 0.0022 | -0.0257 | 0.0016 | 0.0193 | 0.0172 |
| rs4497562 | G | A | 0.004 | | 0.002 | 0.0046 | 0.0052 | rs4405450 | 0.0022 | 0.0022 | -0.0112 | 0.0016 | 0.0002 | 0.0175 |
| rs11623285 | T | G | 0.003 | | 0.003 | 0.0053 | 0.0076 |  | -0.0042 | 0.0029 | -0.0135 | 0.0021 | 0.0018 | 0.0239 |
| rs4899012 | C | G | 0.004 | | 0.002 | -0.0025 | 0.0041 | rs10483727 | -0.0009 | 0.0020 | -0.0103 | 0.0014 | 0.0079 | 0.0156 |
| rs1952183 | A | G | 0.005 | | 0.002 | 0.0057 | 0.0047 | rs10484022 | 0.0033 | 0.0019 | -0.0089 | 0.0014 | -0.0071 | 0.0156 |
| rs2496482 | C | T | 0.006 | | 0.002 | -0.0010 | 0.0053 |  | 0.0067 | 0.0020 | -0.0121 | 0.0015 | 0.0030 | 0.0164 |
| rs117799466 | G | C | 0.006 | | 0.002 |  |  |  | -0.0098 | 0.0023 | -0.0106 | 0.0016 | -0.0336 | 0.0183 |
| rs1529597 | C | A | 0.010 | | 0.006 | 0.0312 | 0.0134 |  | -0.0004 | 0.0055 | -0.0223 | 0.0038 | 0.0209 | 0.0430 |
| rs56391344 | G | A | 0.010 | | 0.002 | 0.0133 | 0.0057 | rs11856579 | -0.0017 | 0.0023 | -0.0148 | 0.0016 | 0.0241 | 0.0178 |
| rs17248751 | A | G | 0.005 | | 0.002 | -0.0020 | 0.0058 |  | 0.0008 | 0.0024 | -0.0136 | 0.0017 | 0.0151 | 0.0187 |
| rs12602286 | G | T | 0.005 | | 0.003 | 0.0090 | 0.0079 |  | 0.0000 | 0.0029 | -0.0160 | 0.0021 | 0.0137 | 0.0234 |
| rs17622379 | C | T | 0.001 | | 0.003 | 0.0042 | 0.0060 | rs1352920 | -0.0015 | 0.0025 | 0.0113 | 0.0018 | 0.0039 | 0.0194 |
| rs68145588 | T | G | 0.004 | | 0.003 | 0.0023 | 0.0074 | rs9915387 | 0.0057 | 0.0028 | -0.0127 | 0.0021 | -0.0006 | 0.0228 |
| rs111852224 | C | T | 0.005 | | 0.003 |  |  |  | 0.0010 | 0.0030 | -0.0156 | 0.0022 | 0.0124 | 0.0239 |
| rs978807 | G | A | 0.001 | | 0.003 | 0.0150 | 0.0060 |  | 0.0012 | 0.0025 | -0.0139 | 0.0018 | 0.0449 | 0.0198 |
| rs2852349 | T | C | 0.005 | | 0.002 | 0.0010 | 0.0047 |  | -0.0033 | 0.0019 | -0.0093 | 0.0014 | 0.0088 | 0.0153 |
| rs34298584 | G | A | 0.007 | | 0.003 | 0.0065 | 0.0064 | rs12970733 | 0.0067 | 0.0026 | -0.0111 | 0.0019 | -0.0230 | 0.0203 |
| rs2043187 | G | A | 0.007 | | 0.002 |  |  |  | -0.0013 | 0.0022 | -0.0107 | 0.0015 | 0.0122 | 0.0170 |
| rs12151248 | T | C | 0.005 | | 0.003 | -0.0077 | 0.0086 |  | -0.0012 | 0.0031 | -0.0149 | 0.0023 | -0.0061 | 0.0250 |
| rs12981405 | T | C | 0.007 | | 0.003 | -0.0066 | 0.0051 | rs4808960 | 0.0052 | 0.0026 | -0.0112 | 0.0019 | -0.0140 | 0.0202 |
| rs7255223 | C | A | 0.004 | | 0.002 | 0.0074 | 0.0053 |  | -0.0034 | 0.0022 | -0.0097 | 0.0016 | 0.0352 | 0.0179 |
| rs173003 | A | C | 0.008 | | 0.002 | 0.0014 | 0.0053 | rs231238 | 0.0011 | 0.0020 | -0.0082 | 0.0014 | 0.0192 | 0.0153 |
| rs4810894 | G | A | 0.001 | | 0.002 | 0.0073 | 0.0049 | rs4810896 | -0.0038 | 0.0020 | 0.0085 | 0.0015 | -0.0078 | 0.0161 |
| rs6123924 | G | A | 0.001 | | 0.003 | 0.0063 | 0.0072 | rs6015540 | -0.0007 | 0.0027 | -0.0129 | 0.0019 | 0.0009 | 0.0216 |
| rs6065080 | C | T | 0.001 | | 0.002 | 0.0069 | 0.0049 |  | 0.0069 | 0.0020 | 0.0130 | 0.0015 | -0.0035 | 0.0160 |
| rs743316 | T | C | 0.001 | | 0.002 | -0.0027 | 0.0058 |  | -0.0014 | 0.0024 | 0.0112 | 0.0017 | -0.0174 | 0.0189 |
| EA: Effect allele; OA: Other allele; SE: Standard Error | | | | | | | | | | | | | | |
