# Supplementary material for: Cigarette Smoking and Endometrial Cancer Risk: Observational and Mendelian Randomization Analyses
Source: Oxford University Press journal article supplement (doi:10.1158/1055-9965.epi-21-1176), 2022-06-16
Supplement: epi-21-1176_supplementary_table_2_suppst2.docx [file epi-21-1176_supplementary_table_2_suppst2.docx]

| **Supplementary Table 2. Summary-level genetic association data of ever having smoked regularly, body mass index, alcohol consumption, educational attainment, and endometrial cancer.** | | | | | | | | | | | | | |
| --- | --- | --- | --- | --- | --- | --- | --- | --- | --- | --- | --- | --- | --- |
|  |  |  | Ever smoking | | Body mass index | | | Alcohol consumption | | Educational attainment | | Endometrial cancer | |
| Ever having smoked regularly genome-wide significant variants | | | | | | | | | |  |  |  |  |
| Variant | EA | OA | Beta | SE | Beta | SE | Proxy variant | Beta | SE | Beta | SE | Beta | SE |
| rs301807 | G | A | 0.018 | 0.0026 | 0.0094 | 0.0047 | rs301819 | 0.0019 | 0.0020 | -0.0048 | 0.0017 | 0.0126 | 0.0157 |
| rs2637869 | A | G | 0.0182 | 0.0028 | -0.0116 | 0.0051 | rs1329967 | 0.0053 | 0.0021 | 0.0025 | 0.0019 | -0.0102 | 0.0173 |
| rs951740 | A | G | 0.0295 | 0.0026 | -0.0012 | 0.0049 | rs2842185 | 0.0043 | 0.0020 | -0.0173 | 0.0018 | -0.0139 | 0.0158 |
| rs12022778 | C | A | 0.0268 | 0.0032 | 0.0200 | 0.0059 |  | 0.0068 | 0.0024 | 0.0033 | 0.0021 | -0.0127 | 0.0190 |
| rs10789369 | A | G | 0.0234 | 0.0026 | 0.0015 | 0.0049 |  | 0.0036 | 0.0020 | -0.0035 | 0.0018 | 0.0159 | 0.0155 |
| rs12027999 | T | C | 0.0244 | 0.0039 | 0.0026 | 0.0069 | rs12026615 | 0.0037 | 0.0029 | -0.0031 | 0.0026 | 0.0229 | 0.0233 |
| rs147052174 | T | G | 0.0623 | 0.0098 |  |  |  | 0.0059 | 0.0075 | -0.0081 | 0.0064 | -0.0104 | 0.0604 |
| rs12739243 | T | C | 0.0213 | 0.0031 | 0.0028 | 0.0055 |  | 0.0058 | 0.0023 | -0.0076 | 0.0020 | 0.0260 | 0.0184 |
| rs62106258 | T | C | 0.0455 | 0.006 |  |  |  | 0.0176 | 0.0048 | 0.0038 | 0.0043 | 0.1250 | 0.0435 |
| rs6731872 | G | T | 0.0316 | 0.0034 | 0.0659 | 0.0062 | rs7576635 | 0.0072 | 0.0025 | -0.0047 | 0.0023 | 0.0374 | 0.0203 |
| rs1004787 | A | G | 0.0284 | 0.0026 |  |  |  | 0.0152 | 0.0020 | -0.0049 | 0.0017 | -0.0137 | 0.0154 |
| rs6750107 | A | G | 0.0146 | 0.0026 | -0.0022 | 0.0047 |  | -0.0003 | 0.0020 | 0.0029 | 0.0017 | 0.0081 | 0.0157 |
| rs1901477 | G | A | 0.0304 | 0.0026 | 0.0096 | 0.0047 | rs1451978 | 0.0019 | 0.0020 | -0.0081 | 0.0017 | -0.0017 | 0.0152 |
| rs3811038 | C | T | 0.0191 | 0.0028 | 0.0024 | 0.0052 |  | 0.0081 | 0.0022 | -0.0066 | 0.0019 | 0.0162 | 0.0169 |
| rs6756212 | C | T | 0.0339 | 0.0026 | 0.0009 | 0.0046 | rs6721116 | 0.0007 | 0.0019 | 0.0010 | 0.0017 | -0.0257 | 0.0153 |
| rs16826827 | T | C | 0.0222 | 0.0039 | -0.0015 | 0.0072 |  | 0.0004 | 0.0029 | 0.0006 | 0.0026 | -0.0273 | 0.0238 |
| rs748832 | G | A | 0.0172 | 0.0026 | -0.0031 | 0.0049 |  | 0.0049 | 0.0020 | -0.0113 | 0.0018 | -0.0004 | 0.0158 |
| rs10446419 | A | G | 0.0196 | 0.0031 | 0.0045 | 0.0061 |  | 0.0016 | 0.0025 | -0.0053 | 0.0021 | -0.0119 | 0.0189 |
| rs2526390 | T | C | 0.0205 | 0.0027 | 0.0068 | 0.0050 | rs12632110 | 0.0013 | 0.0021 | -0.0220 | 0.0018 | 0.0068 | 0.0161 |
| rs11128203 | A | T | 0.0204 | 0.0026 | -0.0129 | 0.0049 | rs13093086 | 0.0064 | 0.0020 | -0.0018 | 0.0017 | 0.0039 | 0.0155 |
| rs62246017 | G | A | 0.0162 | 0.0027 | 0.0007 | 0.0050 | rs6549393 | -0.0025 | 0.0021 | -0.0108 | 0.0018 | -0.0134 | 0.0168 |
| rs1549979 | C | T | 0.0245 | 0.0026 | 0.0138 | 0.0041 |  | 0.0139 | 0.0020 | -0.0081 | 0.0018 | -0.0308 | 0.0158 |
| rs1187820 | C | T | 0.0143 | 0.0026 | 0.0206 | 0.0049 | rs247975 | -0.0006 | 0.0020 | -0.0014 | 0.0017 | -0.0011 | 0.0164 |
| rs59537158 | T | C | 0.0225 | 0.0031 |  |  |  | -0.0047 | 0.0024 | -0.0053 | 0.0021 | 0.0226 | 0.0197 |
| rs55944129 | T | C | 0.0176 | 0.0029 | 0.0015 | 0.0052 | rs10939239 | 0.0009 | 0.0022 | -0.0081 | 0.0020 | 0.0266 | 0.0173 |
| rs58400863 | G | A | 0.0202 | 0.0027 | 0.0069 | 0.0052 | rs11941714 | 0.0003 | 0.0021 | -0.0010 | 0.0018 | 0.0015 | 0.0165 |
| rs7696257 | A | G | 0.0153 | 0.0026 | -0.0030 | 0.0049 | rs6829369 | -0.0005 | 0.0021 | -0.0096 | 0.0018 | 0.0057 | 0.0160 |
| rs13109980 | G | A | 0.0222 | 0.0027 | 0.0077 | 0.0050 |  | -0.0007 | 0.0021 | -0.0098 | 0.0018 | 0.0016 | 0.0164 |
| rs13110073 | T | C | 0.0246 | 0.0026 | 0.0031 | 0.0047 | rs6812864 | 0.0025 | 0.0020 | -0.0094 | 0.0017 | 0.0100 | 0.0155 |
| rs71592686 | C | T | 0.0207 | 0.0029 | 0.0027 | 0.0053 | rs4647028 | 0.0048 | 0.0022 | -0.0163 | 0.0019 | -0.0012 | 0.0170 |
| rs6452785 | C | T | 0.0269 | 0.0026 | 0.0064 | 0.0047 | rs11952470 | -0.0077 | 0.0019 | -0.0114 | 0.0018 | 0.0368 | 0.0153 |
| rs42417 | T | C | 0.0169 | 0.0028 | 0.0064 | 0.0051 | rs27003 | 0.0018 | 0.0021 | -0.0029 | 0.0018 | -0.0029 | 0.0168 |
| rs329124 | A | G | 0.0164 | 0.0026 | 0.0108 | 0.0047 |  | -0.0001 | 0.0019 | -0.0082 | 0.0017 | 0.0029 | 0.0154 |
| rs1173461 | T | C | 0.0166 | 0.0027 | 0.0010 | 0.0050 | rs1177762 | -0.0011 | 0.0021 | -0.0041 | 0.0018 | 0.0105 | 0.0166 |
| rs6890961 | C | T | 0.0193 | 0.0026 | -0.0057 | 0.0052 |  | -0.0011 | 0.0020 | -0.0049 | 0.0018 | 0.0085 | 0.0163 |
| rs2173019 | A | T | 0.0282 | 0.0033 | 0.0107 | 0.0062 |  | 0.0009 | 0.0026 | -0.0086 | 0.0022 | 0.0252 | 0.0204 |
| rs1150668 | T | G | 0.0185 | 0.0026 | 0.0001 | 0.0049 |  | 0.0013 | 0.0020 | 0.0006 | 0.0017 | 0.0101 | 0.0154 |
| rs7743165 | G | T | 0.0193 | 0.0025 | -0.0004 | 0.0046 |  | 0.0055 | 0.0019 | -0.0021 | 0.0017 | 0.0011 | 0.0153 |
| rs10945141 | A | G | 0.0181 | 0.0029 | -0.0174 | 0.0053 |  | -0.0002 | 0.0022 | 0.0007 | 0.0019 | -0.0082 | 0.0175 |
| rs17554906 | C | G | 0.0142 | 0.0026 | 0.0006 | 0.0049 |  | 0.0030 | 0.0019 | 0.0035 | 0.0017 | 0.0114 | 0.0154 |
| rs12195240 | A | G | 0.0249 | 0.0028 | -0.0027 | 0.0052 |  | 0.0074 | 0.0021 | 0.0124 | 0.0019 | 0.0078 | 0.0171 |
| rs118202 | G | T | 0.0367 | 0.0033 | -0.0093 | 0.0059 |  | 0.0056 | 0.0025 | 0.0005 | 0.0022 | -0.0254 | 0.0195 |
| rs10272990 | T | C | 0.0209 | 0.0027 | -0.0025 | 0.0053 | rs1107199 | 0.0023 | 0.0020 | -0.0014 | 0.0018 | -0.0061 | 0.0167 |
| rs13237637 | G | C | 0.0237 | 0.0025 | -0.0026 | 0.0047 | rs6964838 | 0.0027 | 0.0020 | -0.0094 | 0.0017 | 0.0072 | 0.0152 |
| rs7809303 | G | A | 0.0214 | 0.0027 | -0.0108 | 0.0051 |  | 0.0110 | 0.0021 | 0.0043 | 0.0018 | 0.0008 | 0.0163 |
| rs7802996 | C | T | 0.0209 | 0.0034 | -0.0054 | 0.0064 |  | 0.0063 | 0.0026 | 0.0046 | 0.0023 | 0.0065 | 0.0208 |
| rs76841737 | C | G | 0.0231 | 0.0042 | 0.0038 | 0.0079 | rs17164031 | 0.0033 | 0.0031 | 0.0014 | 0.0028 | -0.0586 | 0.0250 |
| rs11766326 | T | C | 0.0175 | 0.0026 | 0.0037 | 0.0046 | rs17158596 | 0.0010 | 0.0019 | 0.0013 | 0.0017 | -0.0182 | 0.0154 |
| rs10233018 | G | A | 0.0246 | 0.0025 | 0.0013 | 0.0046 | rs1477114 | 0.0013 | 0.0019 | -0.0105 | 0.0017 | -0.0288 | 0.0153 |
| rs2952251 | G | A | 0.0164 | 0.003 | 0.0064 | 0.0053 | rs2975635 | -0.0045 | 0.0022 | 0.0015 | 0.0019 | 0.0182 | 0.0177 |
| rs11783093 | C | T | 0.0471 | 0.0035 | -0.0034 | 0.0064 |  | -0.0034 | 0.0027 | -0.0024 | 0.0023 | 0.0304 | 0.0214 |
| rs6993429 | C | A | 0.0191 | 0.0026 | -0.0029 | 0.0046 |  | 0.0044 | 0.0019 | -0.0016 | 0.0017 | 0.0046 | 0.0156 |
| rs290601 | T | C | 0.0163 | 0.0029 | 0.0066 | 0.0052 | rs169709 | 0.0064 | 0.0022 | -0.0022 | 0.0019 | -0.0099 | 0.0172 |
| rs3847244 | T | C | 0.0187 | 0.0026 |  |  |  | 0.0026 | 0.0020 | -0.0056 | 0.0017 | -0.0137 | 0.0157 |
| rs7024924 | C | T | 0.0189 | 0.0034 | 0.0048 | 0.0061 |  | 0.0022 | 0.0025 | -0.0022 | 0.0022 | -0.0021 | 0.0200 |
| rs1931431 | C | G | 0.0182 | 0.0026 | 0.0102 | 0.0047 | rs10756197 | 0.0017 | 0.0019 | -0.0055 | 0.0017 | -0.0081 | 0.0156 |
| rs10966092 | T | C | 0.0205 | 0.0029 | 0.0068 | 0.0055 | rs10811973 | 0.0021 | 0.0022 | -0.0062 | 0.0019 | -0.0135 | 0.0179 |
| rs4877285 | G | A | 0.0181 | 0.0027 | 0.0078 | 0.0044 |  | 0.0017 | 0.0021 | -0.0076 | 0.0018 | -0.0026 | 0.0169 |
| rs34553878 | G | A | 0.0247 | 0.0041 |  |  |  | 0.0027 | 0.0032 | -0.0027 | 0.0028 | -0.0629 | 0.0263 |
| rs10858334 | G | C | 0.0229 | 0.0038 | 0.0165 | 0.0080 |  | -0.0061 | 0.0031 | 0.0044 | 0.0025 | -0.0406 | 0.0239 |
| rs7072776 | A | G | 0.022 | 0.0028 | 0.0134 | 0.0053 |  | -0.0006 | 0.0022 | -0.0072 | 0.0019 | 0.0435 | 0.0167 |
| rs2796793 | A | G | 0.0145 | 0.0026 | -0.0037 | 0.0047 |  | 0.0020 | 0.0019 | -0.0007 | 0.0017 | -0.0044 | 0.0153 |
| rs7921378 | G | C | 0.0233 | 0.0025 | -0.0040 | 0.0047 |  | 0.0036 | 0.0019 | -0.0021 | 0.0017 | -0.0234 | 0.0156 |
| rs11594623 | C | T | 0.0274 | 0.003 |  |  |  | -0.0002 | 0.0023 | -0.0063 | 0.0020 | 0.0217 | 0.0179 |
| rs12244388 | A | G | 0.0258 | 0.0027 | 0.0088 | 0.0040 | rs4532960 | 0.0048 | 0.0020 | -0.0065 | 0.0018 | -0.0046 | 0.0159 |
| rs10885480 | T | C | 0.0187 | 0.0028 | -0.0084 | 0.0043 | rs2185913 | -0.0010 | 0.0022 | -0.0080 | 0.0019 | 0.0291 | 0.0172 |
| rs4752018 | A | C | 0.0189 | 0.003 | 0.0175 | 0.0055 |  | 0.0004 | 0.0023 | -0.0058 | 0.0020 | 0.0148 | 0.0182 |
| rs62618693 | C | T | 0.0353 | 0.0063 |  |  |  | 0.0027 | 0.0048 | -0.0094 | 0.0043 | -0.0114 | 0.0392 |
| rs61886926 | C | T | 0.0179 | 0.0026 | -0.0061 | 0.0053 | rs11606081 | 0.0006 | 0.0020 | -0.0039 | 0.0017 | -0.0159 | 0.0156 |
| rs7943721 | G | A | 0.0212 | 0.0034 | -0.0041 | 0.0064 | rs10751226 | 0.0038 | 0.0026 | -0.0007 | 0.0023 | 0.0615 | 0.0209 |
| rs2155646 | C | T | 0.0378 | 0.0026 | -0.0232 | 0.0047 | rs2186874 | 0.0066 | 0.0020 | -0.0073 | 0.0017 | 0.0003 | 0.0156 |
| rs540860 | G | A | 0.0176 | 0.0026 | -0.0039 | 0.0047 |  | 0.0086 | 0.0019 | -0.0016 | 0.0017 | 0.0073 | 0.0154 |
| rs1106363 | T | C | 0.0174 | 0.0027 | 0.0027 | 0.0054 |  | 0.0009 | 0.0020 | 0.0004 | 0.0018 | -0.0078 | 0.0159 |
| rs13906 | C | T | 0.0245 | 0.0041 | 0.0008 | 0.0081 |  | 0.0052 | 0.0031 | -0.0108 | 0.0028 | -0.0181 | 0.0243 |
| rs7969559 | A | G | 0.017 | 0.0028 | 0.0139 | 0.0052 |  | 0.0032 | 0.0022 | 0.0014 | 0.0019 | 0.0090 | 0.0175 |
| rs77215829 | A | C | 0.024 | 0.0038 |  |  |  | -0.0014 | 0.0029 | -0.0039 | 0.0026 | -0.0046 | 0.0229 |
| rs1109480 | G | A | 0.0167 | 0.0026 |  |  |  | 0.0048 | 0.0020 | -0.0047 | 0.0018 | 0.0010 | 0.0161 |
| rs56367474 | C | T | 0.0173 | 0.0028 | -0.0123 | 0.0051 | rs17055640 | 0.0059 | 0.0021 | 0.0054 | 0.0019 | -0.0222 | 0.0167 |
| rs55786907 | G | A | 0.0194 | 0.0035 | 0.0027 | 0.0066 | rs9597967 | -0.0033 | 0.0026 | -0.0031 | 0.0023 | 0.0084 | 0.0208 |
| rs9545155 | T | C | 0.0161 | 0.0026 | -0.0024 | 0.0047 |  | 0.0035 | 0.0019 | -0.0002 | 0.0017 | -0.0145 | 0.0153 |
| rs7333559 | G | A | 0.0232 | 0.0031 |  |  |  | -0.0030 | 0.0024 | -0.0060 | 0.0021 | 0.0202 | 0.0199 |
| rs1108130 | A | T | 0.0239 | 0.0031 | -0.0045 | 0.0058 | rs9557367 | 0.0092 | 0.0024 | -0.0084 | 0.0021 | -0.0453 | 0.0188 |
| rs12878369 | A | C | 0.0174 | 0.0026 | 0.0005 | 0.0049 | rs8013650 | 0.0003 | 0.0020 | 0.0048 | 0.0017 | -0.0004 | 0.0157 |
| rs1811739 | A | G | 0.0183 | 0.003 | -0.0055 | 0.0054 | rs17105232 | 0.0037 | 0.0023 | -0.0065 | 0.0020 | 0.0169 | 0.0178 |
| rs8005334 | G | T | 0.0167 | 0.0027 | -0.0154 | 0.0049 |  | -0.0007 | 0.0020 | -0.0011 | 0.0018 | -0.0068 | 0.0159 |
| rs1381287 | T | C | 0.018 | 0.0026 | -0.0054 | 0.0049 |  | 0.0008 | 0.0020 | -0.0030 | 0.0017 | -0.0034 | 0.0154 |
| rs1435672 | C | T | 0.0141 | 0.0026 | 0.0033 | 0.0047 | rs11631486 | 0.0008 | 0.0019 | 0.0013 | 0.0017 | 0.0330 | 0.0159 |
| rs281296 | A | G | 0.0247 | 0.0027 | -0.0069 | 0.0050 |  | 0.0094 | 0.0020 | -0.0061 | 0.0018 | -0.0197 | 0.0159 |
| rs62007780 | G | T | 0.0159 | 0.0026 | 0.0029 | 0.0049 | rs10851896 | 0.0002 | 0.0020 | -0.0122 | 0.0017 | 0.0368 | 0.0156 |
| rs4310804 | C | G | 0.0182 | 0.003 | -0.0093 | 0.0053 | rs7173576 | -0.0001 | 0.0023 | -0.0007 | 0.0020 | -0.0186 | 0.0183 |
| rs1139897 | G | A | 0.0241 | 0.003 | 0.0112 | 0.0057 | rs4984683 | -0.0061 | 0.0025 | -0.0114 | 0.0020 | 0.0027 | 0.0181 |
| rs7188873 | G | A | 0.0203 | 0.0026 | 0.0119 | 0.0049 | rs8056132 | 0.0036 | 0.0020 | -0.0106 | 0.0018 | -0.0182 | 0.0156 |
| rs4785187 | A | G | 0.02 | 0.0031 | 0.0092 | 0.0049 |  | -0.0028 | 0.0024 | -0.0106 | 0.0020 | -0.0115 | 0.0188 |
| rs8050598 | T | C | 0.0187 | 0.0029 |  |  |  | 0.0032 | 0.0024 | -0.0001 | 0.0020 | 0.0039 | 0.0194 |
| rs9302604 | G | A | 0.0187 | 0.0026 | 0.0094 | 0.0047 |  | 0.0073 | 0.0020 | 0.0008 | 0.0017 | 0.0018 | 0.0156 |
| rs4790874 | T | C | 0.0174 | 0.0026 |  |  |  | 0.0026 | 0.0020 | -0.0021 | 0.0018 | 0.0068 | 0.0159 |
| rs28441558 | T | C | 0.0356 | 0.0055 | -0.0168 | 0.0112 | rs9898040 | 0.0116 | 0.0041 | -0.0083 | 0.0037 | -0.0049 | 0.0346 |
| rs67777803 | G | T | 0.0246 | 0.0034 | 0.0018 | 0.0062 | rs11080075 | -0.0013 | 0.0026 | 0.0002 | 0.0023 | -0.0270 | 0.0203 |
| rs3764351 | G | A | 0.0147 | 0.0027 | -0.0033 | 0.0042 | rs12150298 | -0.0063 | 0.0021 | -0.0089 | 0.0018 | 0.0063 | 0.0161 |
| rs75919030 | T | C | 0.021 | 0.0029 | 0.0052 | 0.0053 | rs16951004 | 0.0044 | 0.0022 | 0.0002 | 0.0019 | -0.0071 | 0.0173 |
| rs67050670 | A | G | 0.0203 | 0.003 | 0.0027 | 0.0057 | rs4890355 | 0.0062 | 0.0023 | -0.0047 | 0.0020 | 0.0112 | 0.0181 |
| rs1373178 | T | G | 0.0203 | 0.0026 | 0.0085 | 0.0049 |  | 0.0064 | 0.0020 | -0.0051 | 0.0017 | 0.0413 | 0.0162 |
| rs72938304 | G | A | 0.0272 | 0.004 | -0.0021 | 0.0079 | rs870778 | 0.0067 | 0.0031 | -0.0004 | 0.0026 | 0.0097 | 0.0242 |
| rs71367544 | T | C | 0.0206 | 0.0032 | 0.0096 | 0.0064 | rs7241572 | -0.0030 | 0.0024 | -0.0124 | 0.0021 | 0.0073 | 0.0199 |
| rs113230003 | G | A | 0.0189 | 0.0029 | 0.0159 | 0.0045 | rs17724992 | -0.0002 | 0.0023 | -0.0061 | 0.0020 | 0.0314 | 0.0179 |
| rs8103660 | C | T | 0.0158 | 0.0027 | 0.0105 | 0.0049 | rs1560118 | 0.0035 | 0.0020 | -0.0056 | 0.0018 | -0.0327 | 0.0159 |
| rs6050446 | G | A | 0.0544 | 0.0076 | 0.0292 | 0.0118 |  | 0.0196 | 0.0057 | -0.0121 | 0.0048 | 0.0363 | 0.0453 |
| rs6073075 | T | A | 0.0187 | 0.0034 | -0.0075 | 0.0062 | rs6030819 | 0.0030 | 0.0026 | -0.0101 | 0.0022 | 0.0495 | 0.0201 |
| rs910912 | T | C | 0.0168 | 0.0029 | -0.0048 | 0.0052 |  | 0.0019 | 0.0022 | 0.0011 | 0.0019 | -0.0140 | 0.0172 |
| rs4818005 | G | A | 0.0204 | 0.0026 | -0.0071 | 0.0052 | rs4624474 | 0.0036 | 0.0020 | 0.0028 | 0.0017 | 0.0018 | 0.0154 |
| rs4822102 | C | T | 0.0165 | 0.0026 | -0.0062 | 0.0049 |  | 0.0025 | 0.0020 | 0.0037 | 0.0017 | -0.0185 | 0.0159 |
| rs9627272 | G | C | 0.0155 | 0.0026 | -0.0008 | 0.0050 | rs8137243 | 0.0020 | 0.0021 | -0.0037 | 0.0018 | 0.0117 | 0.0173 |
| Body mass index genome-wide significant variants | | | | | | | | | | | | | |
| rs9816226 | T | A | 0.001 | 0.0023 | 0.0406 | 0.0052 |  | -0.0043 | 0.0025 | 0.0078 | 0.0022 | 0.0165 | 0.0201 |
| rs1000096 | T | C | 0.0034 | 0.0018 | -0.0137 | 0.0051 |  | 0.0003 | 0.0020 | 0.0099 | 0.0017 | -0.0359 | 0.0158 |
| rs7748777 | A | G | 0.0035 | 0.0018 | 0.0123 | 0.0041 |  | -0.0031 | 0.0020 | 0.0019 | 0.0017 | 0.0311 | 0.0155 |
| rs3851083 | G | A | 0.0017 | 0.0018 | 0.0116 | 0.0040 |  | -0.0021 | 0.0019 | -0.0050 | 0.0017 | 0.0029 | 0.0155 |
| rs329651 | T | G | 0.0006 | 0.0024 | 0.0206 | 0.0053 |  | -0.0049 | 0.0025 | -0.0075 | 0.0022 | 0.0249 | 0.0198 |
| rs2467110 | T | C | 0.0033 | 0.002 | -0.0087 | 0.0055 |  | -0.0001 | 0.0022 | -0.0032 | 0.0019 | 0.0192 | 0.0172 |
| rs11611496 | G | A | 0.0094 | 0.0021 | 0.0166 | 0.0057 |  | 0.0051 | 0.0023 | -0.0059 | 0.0020 | 0.0078 | 0.0190 |
| rs12429545 | G | A | 0.0048 | 0.0027 | -0.0322 | 0.0060 |  | 0.0020 | 0.0030 | 0.0000 | 0.0025 | -0.0348 | 0.0230 |
| rs9530843 | A | C | 0.0036 | 0.0018 | 0.0107 | 0.0050 |  | -0.0003 | 0.0019 | -0.0027 | 0.0017 | 0.0039 | 0.0159 |
| rs16965062 | C | T | 0.0021 | 0.0018 | -0.0044 | 0.0047 |  | 0.0025 | 0.0019 | 0.0003 | 0.0017 | 0.0030 | 0.0156 |
| rs895330 | C | G | 0.0025 | 0.0022 | 0.0170 | 0.0066 |  | 0.0027 | 0.0026 | -0.0034 | 0.0022 | 0.0231 | 0.0201 |
| rs11672660 | T | C | 0.0006 | 0.0022 | -0.0321 | 0.0050 |  | -0.0029 | 0.0025 | 0.0031 | 0.0021 | -0.0336 | 0.0195 |
| rs1884897 | G | A | 0.0018 | 0.0018 | 0.0141 | 0.0041 |  | 0.0045 | 0.0020 | 0.0010 | 0.0018 | 0.0290 | 0.0159 |
| rs8123881 | G | A | 0.0018 | 0.0025 | 0.0235 | 0.0058 |  | -0.0032 | 0.0029 | -0.0009 | 0.0025 | -0.0035 | 0.0234 |
| rs17806379 | C | T | 0.0019 | 0.0023 | 0.0346 | 0.0061 |  | 0.0000 | 0.0025 | -0.0079 | 0.0022 | 0.0430 | 0.0202 |
| rs559267 | G | A | 0.001 | 0.0019 | 0.0088 | 0.0042 |  | 0.0011 | 0.0021 | 0.0000 | 0.0018 | 0.0444 | 0.0168 |
| rs2838006 | C | T | 0.0046 | 0.0018 | 0.0196 | 0.0050 |  | 0.0038 | 0.0020 | -0.0142 | 0.0018 | -0.0222 | 0.0158 |
| rs427943 | C | A | 0.0051 | 0.0018 | 0.0117 | 0.0046 |  | -0.0010 | 0.0020 | -0.0040 | 0.0017 | -0.0045 | 0.0154 |
| Alcohol consumption genome-wide significant variants | | | | | | | | | | | | | |
| rs1123285 | C | G | 0.0042 | 0.0019 | -0.0044 | 0.0051 |  | 0.0089 | 0.0015 | -0.0077 | 0.0018 | 0.0123 | 0.0163 |
| rs378421 | G | A | 0.0026 | 0.0018 |  |  |  | 0.0112 | 0.0015 | 0.0159 | 0.0019 | -0.0606 | 0.0175 |
| Educational attainment genome-wide significant variants | | | | | | | | | | | | | |
| rs13018640 | T | C | 0.0043 | 0.0018 | 0.0095 | 0.0047 | rs11689199 | 0.0041 | 0.0020 | -0.0215 | 0.0014 | -0.0217 | 0.0158 |
| rs363096 | C | T | 0.0011 | 0.0018 | -0.0027 | 0.0047 |  | 0.0088 | 0.0020 | 0.0143 | 0.0014 | -0.0027 | 0.0154 |
| rs7683416 | C | T | 0.0004 | 0.0018 | 0.0025 | 0.0046 |  | -0.0071 | 0.0019 | -0.0139 | 0.0014 | -0.0154 | 0.0152 |
| rs28587776 | C | T | 0.0022 | 0.0018 |  |  |  | 0.0005 | 0.0020 | -0.0088 | 0.0015 | 0.0131 | 0.0160 |
| rs2256965 | A | G | 0.0020 | 0.0024 | -0.0022 | 0.0041 |  | 0.0007 | 0.0021 | 0.0106 | 0.0014 | 0.0239 | 0.0154 |
| rs6557171 | T | C | 0.0041 | 0.0019 | 0.0059 | 0.0051 |  | 0.0013 | 0.0021 | -0.0155 | 0.0015 | 0.0090 | 0.0162 |
| rs113588399 | C | T | 0.0051 | 0.0022 | 0.0031 | 0.006 | rs11961360 | -0.0016 | 0.0024 | 0.0104 | 0.0017 | 0.0018 | 0.0190 |
| rs2923424 | G | A | 0.0053 | 0.0018 | 0.0031 | 0.0041 | rs6980507 | 0.0057 | 0.0020 | -0.0120 | 0.0014 | 0.0135 | 0.0163 |
| rs401526 | T | C | 0.0029 | 0.0018 | -0.0001 | 0.0047 | rs837080 | 0.0001 | 0.0019 | -0.0104 | 0.0014 | -0.0042 | 0.0152 |
| rs746839 | C | G | 0.0036 | 0.0019 | -0.0069 | 0.0049 | rs7357604 | 0.0086 | 0.0021 | 0.0135 | 0.0015 | 0.0007 | 0.0158 |
| rs7849487 | T | G | 0.0014 | 0.0019 | 0.0035 | 0.0054 |  | 0.0001 | 0.0020 | -0.0167 | 0.0015 | 0.0075 | 0.0160 |
| rs17148998 | G | A | 0.0043 | 0.0022 | -0.0080 | 0.0058 |  | -0.0015 | 0.0025 | -0.0101 | 0.0017 | 0.0169 | 0.0194 |
| rs11021432 | A | T | 0.0002 | 0.0018 | -0.0021 | 0.0049 | rs12799722 | 0.0009 | 0.0020 | 0.0103 | 0.0015 | -0.0288 | 0.0157 |
| rs3751331 | A | G | 0.0009 | 0.0018 | 0.0056 | 0.0047 | rs1962047 | 0.0037 | 0.0020 | -0.0097 | 0.0014 | -0.0111 | 0.0157 |
| rs1334297 | G | A | 0.0026 | 0.0020 | 0.0119 | 0.0053 |  | -0.0029 | 0.0022 | -0.0257 | 0.0016 | 0.0193 | 0.0172 |
| rs9556958 | T | C | 0.0018 | 0.0018 | 0.0042 | 0.0049 |  | -0.0034 | 0.0020 | -0.0110 | 0.0014 | 0.0062 | 0.0153 |
| rs11157931 | C | A | 0.0008 | 0.0018 | -0.0060 | 0.0047 | rs11157930 | 0.0031 | 0.0020 | 0.0139 | 0.0014 | 0.0192 | 0.0156 |
| rs117799466 | G | C | 0.0000 | 0.0021 |  |  |  | -0.0098 | 0.0023 | -0.0106 | 0.0016 | -0.0336 | 0.0183 |
| rs68145588 | T | G | 0.0037 | 0.0026 | 0.0023 | 0.0074 | rs9915387 | 0.0057 | 0.0028 | -0.0127 | 0.0021 | -0.0006 | 0.0228 |
| rs11082011 | C | T | 0.0031 | 0.0019 | 0.0074 | 0.0057 |  | 0.0034 | 0.0021 | -0.0194 | 0.0015 | 0.0086 | 0.0166 |
| rs2852349 | T | C | 0.0007 | 0.0018 | 0.0010 | 0.0047 |  | -0.0033 | 0.0019 | -0.0093 | 0.0014 | 0.0088 | 0.0153 |
| rs12981405 | T | C | 0.0069 | 0.0024 | -0.0063 | 0.0051 | rs7252888 | 0.0052 | 0.0026 | -0.0112 | 0.0019 | -0.0140 | 0.0202 |
| rs173003 | A | C | 0.0024 | 0.0018 | 0.0014 | 0.0053 | rs231238 | 0.0011 | 0.0020 | -0.0082 | 0.0014 | 0.0192 | 0.0153 |
| rs10402747 | C | T | 0.0038 | 0.0018 | 0.0097 | 0.0045 | rs7260359 | -0.0023 | 0.0020 | -0.0077 | 0.0014 | 0.0278 | 0.0155 |
| rs175325 | A | T | 0.0014 | 0.0018 | -0.0015 | 0.005 | rs199815 | -0.0042 | 0.0020 | -0.0100 | 0.0014 | 0.0076 | 0.0157 |
| rs4810894 | A | G | 0.0024 | 0.0018 | 0.0063 | 0.005 | rs1467417 | 0.0038 | 0.0020 | -0.0085 | 0.0015 | 0.0078 | 0.0161 |
| rs6065080 | C | T | 0.0006 | 0.0019 | 0.0069 | 0.0049 |  | 0.0069 | 0.0020 | 0.0130 | 0.0015 | -0.0035 | 0.0160 |
| rs232496 | T | C | 0.0035 | 0.0018 | 0.0056 | 0.0047 |  | 0.0032 | 0.0020 | 0.0090 | 0.0015 | 0.0088 | 0.0157 |
| rs743316 | C | T | 0.0023 | 0.0022 | 0.0027 | 0.0058 |  | 0.0014 | 0.0024 | -0.0112 | 0.0017 | 0.0174 | 0.0189 |
| rs2838006 | C | T | 0.0046 | 0.0018 | 0.0196 | 0.005 |  | 0.0038 | 0.0020 | -0.0132 | 0.0015 | -0.0222 | 0.0158 |
| rs9977825 | T | C | 0.0075 | 0.0019 | 0.0134 | 0.0051 | rs2838771 | 0.0005 | 0.0021 | -0.0092 | 0.0015 | -0.0132 | 0.0160 |
| rs2297293 | C | G | 0.0005 | 0.0019 | -0.0025 | 0.0051 |  | 0.0083 | 0.0021 | 0.0099 | 0.0015 | 0.0428 | 0.0166 |
| rs165633 | A | G | 0.0033 | 0.0021 |  |  |  | 0.0000 | 0.0023 | -0.0116 | 0.0016 | -0.0038 | 0.0183 |
| rs12170452 | G | A | 0.0003 | 0.0018 | 0.0060 | 0.0049 |  | -0.0007 | 0.0020 | -0.0105 | 0.0014 | 0.0122 | 0.0154 |
| EA: Effect allele; OA: Other allele; SE: Standard Error | | | | | | | | | | | | | |
