# Supplementary material for: Cigarette Smoking and Endometrial Cancer Risk: Observational and Mendelian Randomization Analyses
Source: Oxford University Press journal article supplement (doi:10.1158/1055-9965.epi-21-1176), 2022-06-16
Supplement: epi-21-1176_supplementary_table_4_suppst4.docx [file epi-21-1176_supplementary_table_4_suppst4.docx]

| **Supplementary Table 4. Risk (hazard ratios) of endometrial cancer for smoking characteristics in the European Prospective Investigation into Cancer and Nutrition (EPIC), and UK Biobank.** | | | | |
| --- | --- | --- | --- | --- |
|  | **EPICa** | | **UK Biobankb** | |
| **Exposure** | **Ncase** | **HR (95% CI)** | **Ncase** | **HR (95% CI)** |
| **Smoking status** | |  |  |  |
| Never | 1176 | 1 | 548 | 1 |
| Former | 414 | 0.83 (0.74-0.93) | 159 | 0.80 (0.67-0.96) |
| Current | 291 | 0.80 (0.70-0.91) | 26 | 0.53 (0.36-0.79) |
| **Age of smoking initiation (years)c** | | |  |  |
| 26+ | 119 | 1 | 13 | 1 |
| 16-25 | 427 | 0.83 (0.67-1.03) | 142 | 0.71 (0.40-1.26) |
| <16 | 73 | 0.91 (0.67-1.24) | 29 | 0.45 (0.23-0.87) |
|  | **Former smokers** | | | |
| **Time since smoking cessation (years)d** | | |  |  |
| 20+ | 157 | 1 | 77 | 1 |
| 10-19 | 118 | 0.91 (0.71-1.16) | 45 | 0.92 (0.62-1.38) |
| < 10 | 122 | 0.85 (0.66-1.09) | 37 | 1.30 (0.89-1.90) |
| **Smoking duration (years)e** | |  |  |  |
| < 25 | 279 | 1 | 90 | 1 |
| 25-29 | 41 | 0.89 (0.63-1.24) | 15 | 0.84 (0.49-1.46) |
| 30-39 | 46 | 0.82 (0.59-1.14) | 37 | 1.26 (0.85-1.86) |
| 40+ | 11 | 0.69 (0.36-1.31) | 13 | 0.76 (0.42-1.40) |
| **Average number of cigarettes smoked daily** | | |  |  |
| < 15 | 205 | 1 | 63 | 1 |
| 15+ | 58 | 0.87 (0.64-1.19) | 94 | 0.72 (0.52-1.00) |
|  | **Current smokers** | | | |
| **Smoking duration (years)f** | |  |  |  |
| <25 | 54 | 1 | 2 | 1 |
| 25-29 | 58 | 1.54 (0.99-2.39) | 24 | 0.52 (0.11-2.61) |
| 30-39 | 122 | 1.19 (0.78-1.80) |
| 40+ | 47 | 1.04 (0.60-1.82) |
| **Average number of cigarettes smoked daily** | | |  |  |
| < 15 | 160 | 1 | 14 | 1 |
| 15+ | 50 | 0.92 (0.66-1.27) | 12 | 0.84 (0.37-1.92) |
| a Multivariable Cox regression models using age as the underlying time variable stratified by recruitment assessment centre, and age category (1-year categories). Models adjusted for use of menopausal hormone therapy (ever, never, unknown); oral contraceptive use (ever, never, unknown); age of menopause <50, 50-52, 53-55, > 55 years, not applicable, unknown); parity (0, ≥1, unknown); body mass index (< 20, 20-<22.5, 22.5-<25, 25-<27.5, 27.5-<30, 30-<32.5, 32.5-<35, >35 kg/m2); education (none or primary school completed, technical/professional or secondary school, longer education, unknown); physical activity (inactive, moderate inactive, moderate active, active, unknown); type 2 diabetes (no, yes, unknown). | | | | |
| b Multivariable Cox regression models using age as the underlying time variable stratified by region of recruitment assessment centre, and age category (5-year categories). Models adjusted for use of menopausal hormone therapy (ever, never, unknown); oral contraceptive use (ever, never, unknown); age of menopause <50, 50-52, 53-55, > 55 years, not applicable, unknown); parity (0, ≥1, unknown); body mass index (< 20, 20-<22.5, 22.5-<25, 25-<27.5, 27.5-<30, 30-<32.5, 32.5-<35, >35 kg/m2); education (none, NVQ/HND/HNC, O-level, CSE or equivalent, A-level, college or university, other professionals, unknown); physical activity (low, moderate, high, unknown); type 2 diabetes (no, yes, unknown). | | | | |
| c P-trend: 0.39 in EPIC among ever smokers; P-trend: 0.01 in UK Biobank among ever smokers | | | | |
| d P-trend: 0.19 in EPIC; P-trend: 0.88 in UK Biobank | | | |  |
| e P-trend: 0.11 in EPIC; P-trend: 0.99 in UK Biobank | | | |  |
| f P-trend: 0.78 in EPIC | |  |  |  |
